# Supplementary material for: Assessment of altimetry using ground-based GPS data from the 88S Traverse, Antarctica, in support of ICESat-2
Source: Copernicus journal article supplement (doi:10.5194/tc-13-579-2019), 2019-02-18
Supplement: Supplementary file 1 [file tc-13-579-2019-supplement.zip]

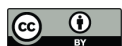

## *Supplement of*

# **Assessment of altimetry using ground-based GPS data from the 88S Traverse, Antarctica, in support of ICESat-2**

**Kelly M. Brunt et al.**

*Correspondence to:* Kelly M. Brunt ([kelly.m.brunt@nasa.gov](mailto:kelly.m.brunt@nasa.gov))

- [tc-13-579-2019-supplement-title-page.pdf](#)
- 88S\_A

- 594A201801010300C.T02
- 594A201801010400C.T02
- 594A201801010500C.T02
- 594A201801010600C.T02
- 594A201801012000C.T02
- 594A201801012100C.T02
- 594A201801012200C.T02
- 594A201801012300C.T02
- 594A201801020000C.T02
- 594A201801020100C.T02
- 594A201801030000C.T02
- 594A201801030100C.T02
- 594A201801030200C.T02
- 594A201801030300C.T02
- 594A201801030400C.T02
- 594A201801030500C.T02
- 594A201801031900C.T02
- 594A201801032000C.T02
- 594A201801032100C.T02
- 594A201801032200C.T02
- 594A201801032300C.T02
- 594A201801040000C.T02

- 594A201801040100C.T02
- 594A201801040200C.T02
- 594A201801040300C.T02
- 594A201801040400C.T02
- 594A201801040500C.T02
- 594A201801040600C.T02
- 594A201801041900C.T02
- 594A201801042000C.T02
- 594A201801042100C.T02
- 594A201801042200C.T02
- 594A201801042300C.T02
- 594A201801050000C.T02
- 594A201801050100C.T02
- 594A201801050200C.T02
- 594A201801050300C.T02
- 594A201801050400C.T02
- 594A201801050500C.T02
- 594A201801050600C.T02
- 594A201801051900C.T02
- 594A201801052000C.T02
- 594A201801052100C.T02
- 594A201801052200C.T02
- 594A201801052300C.T02
- 594A201801060000C.T02
- 594A201801060100C.T02
- 594A201801062000C.T02
- 594A201801062100C.T02
- 594A201801062200C.T02
- 594A201801062300C.T02
- 594A201801070000C.T02
- 594A201801070100C.T02
- 594A201801070200C.T02
- 594A201801070300C.T02
- 594A201801070400C.T02
- 594A201801070500C.T02
- 594A201801070600C.T02
- 594A201801070700C.T02
- 594A201801070800C.T02

- 88S\_B

- 594B201801010000B.T02
- 594B201801010000C.T02

- 594B201801010100B.T02
- 594B201801010100C.T02
- 594B201801010200B.T02
- 594B201801010200C.T02
- 594B201801010300B.T02
- 594B201801010300C.T02
- 594B201801010400B.T02
- 594B201801010400C.T02
- 594B201801010500B.T02
- 594B201801010500C.T02
- 594B201801010600B.T02
- 594B201801010600C.T02
- 594B201801031900B.T02
- 594B201801031900C.T02
- 594B201801032000B.T02
- 594B201801032000C.T02
- 594B201801032100B.T02
- 594B201801032100C.T02
- 594B201801032200B.T02
- 594B201801032200C.T02
- 594B201801032300B.T02
- 594B201801032300C.T02
- 594B201801040000B.T02
- 594B201801040000C.T02
- 594B201801040100B.T02
- 594B201801040100C.T02
- 594B201801040200B.T02
- 594B201801040200C.T02
- 594B201801040300B.T02
- 594B201801040300C.T02
- 594B201801040400B.T02
- 594B201801040400C.T02
- 594B201801040500B.T02
- 594B201801040500C.T02
- 594B201801040600B.T02
- 594B201801040600C.T02
- 594B201801051900B.T02
- 594B201801051900C.T02
- 594B201801052000B.T02
- 594B201801052000C.T02
- 594B201801052100B.T02
- 594B201801052100C.T02

- 594B201801052200B.T02
- 594B201801052200C.T02
- 594B201801052300B.T02
- 594B201801052300C.T02
- 594B201801060000B.T02
- 594B201801060000C.T02
- 594B201801060100B.T02
- 594B201801060100C.T02

The copyright of individual parts of the supplement might differ from the CC BY 4.0 License.
